# Supplementary material for: Improved mineralogical analysis in copper ores by laser-induced breakdown spectroscopy
Source: Royal Society of Chemistry journal article supplement (doi:10.1039/d2ja00145d), 2022-01-01

## Supplementary information

---

### Improved mineralogical analysis in copper ores by Laser-induced breakdown spectroscopy

Jonnathan Álvarez<sup>1,2</sup>, Marizú Velásquez<sup>1</sup>, Claudio Sandoval-Muñoz<sup>1</sup>, Rosario del P.  
Castillo<sup>3,4</sup>, Camila Y. Bastidas<sup>1</sup>, Danny Luarte<sup>5</sup>, Daniel Sbarbaro<sup>5</sup>, Dieter Rammlmair<sup>6</sup>  
and Jorge Yáñez<sup>1\*</sup>

**Table S1.** Number of samples in the sets of calibration (Cal), validation (Val) and testing, according to the chemometric models applied.

| <b>Mineral</b>      | <b>Final Models<br/>Samples</b> | <b>PLS<br/>(Cal/Val)</b> | <b>ANN<br/>(Cal/Val/Test)</b> | <b>MCR-ALS<br/>(Cal/Val)</b> |
|---------------------|---------------------------------|--------------------------|-------------------------------|------------------------------|
| <b>Bornite</b>      | 80                              | 56 \ 24                  | 56 \ 16 \ 8                   | 56 \ 24                      |
| <b>Chalcopyrite</b> | 78                              | 55 \ 23                  | 55 \ 16 \ 7                   | 55 \ 23                      |
| <b>Covellite</b>    | 81                              | 57 \ 24                  | 57 \ 16 \ 8                   | 57 \ 24                      |
| <b>Enargite</b>     | 81                              | 57 \ 24                  | 57 \ 16 \ 8                   | 57 \ 24                      |
| <b>Iron Oxides</b>  | 76                              | 54 \ 22                  | 54 \ 15 \ 7                   | 54 \ 22                      |
| <b>Molybdenite</b>  | 74                              | 52 \ 22                  | 52 \ 15 \ 7                   | 52 \ 22                      |
| <b>Pyrite</b>       | 80                              | 56 \ 24                  | 56 \ 16 \ 8                   | 56 \ 24                      |
| <b>Quartz</b>       | 81                              | 57 \ 24                  | 57 \ 16 \ 8                   | 57 \ 24                      |

**Table S2.** Additional parameters for MCR-ALS with correlation constrains in mineral species calibration.

| <b>Mineral</b>      | <b>Convergence<br/>criterion</b> | <b>Std. Des.<br/>Residuals</b> | <b>LOF<br/>(% Exp)</b> | <b>LOF<br/>(% PCA)</b> | <b>r<sup>2</sup></b> |
|---------------------|----------------------------------|--------------------------------|------------------------|------------------------|----------------------|
| <b>Bornite</b>      | 0.1                              | 0.110                          | 1.192                  | 1.093                  | 99.99                |
| <b>Chalcopyrite</b> | 0.2                              | 0.008                          | 0.840                  | 0.729                  | 99.99                |
| <b>Covellite</b>    | 0.1                              | 0.007                          | 0.668                  | 0.627                  | 99.99                |
| <b>Enargite</b>     | 0.1                              | 0.016                          | 1.713                  | 1.534                  | 99.97                |
| <b>Iron Oxides</b>  | 0.1                              | 0.008                          | 0.776                  | 0.613                  | 99.99                |
| <b>Molybdenite</b>  | 0.1                              | 0.003                          | 0.350                  | 0.281                  | 99.99                |
| <b>Pyrite</b>       | 0.1                              | 0.008                          | 0.790                  | 0.731                  | 99.99                |
| <b>Quartz</b>       | 0.1                              | 0.072                          | 5.608                  | 3.947                  | 99.68                |

**Figure S1.** Elemental data conciliation of copper (Cu), iron (Fe) and sulfur (S) with SEM-MLA.

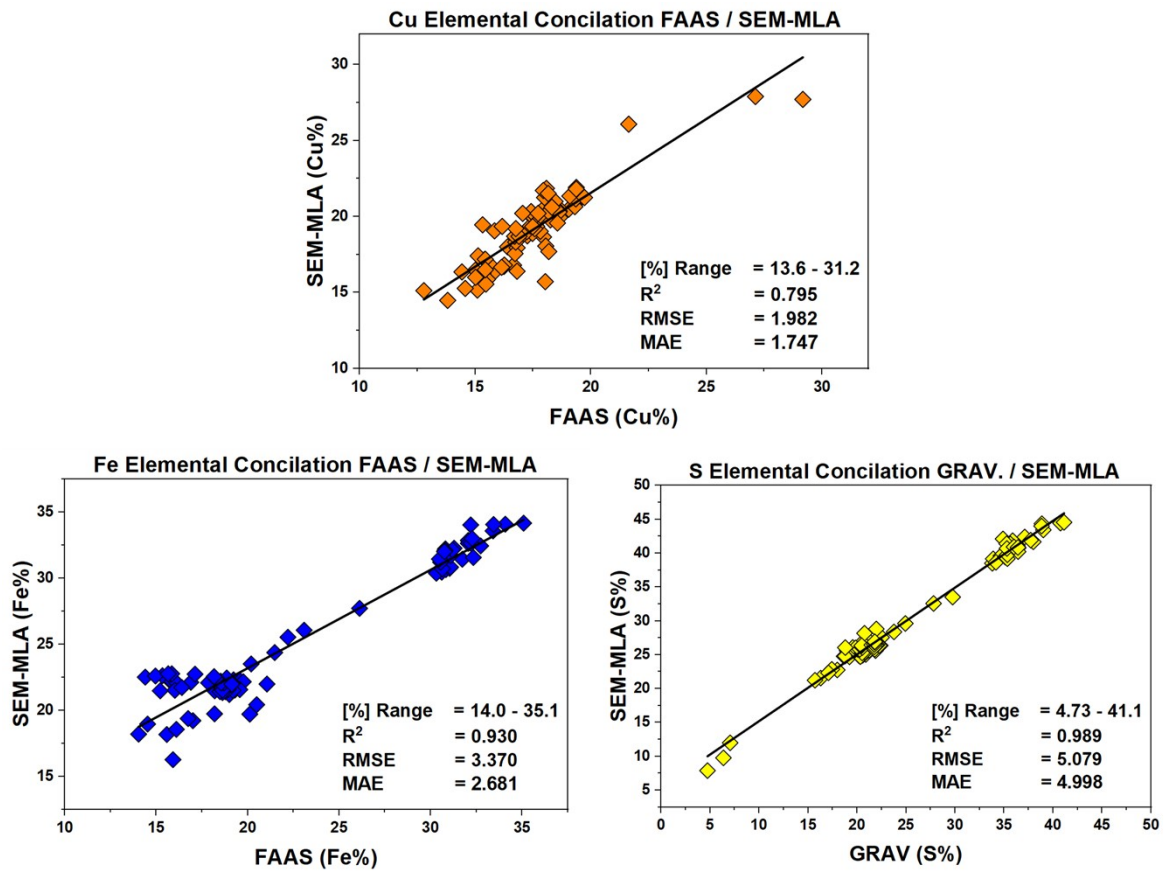

**Figure S2.** Regression vectors achieved in PLS models for mineral species in copper concentrates.

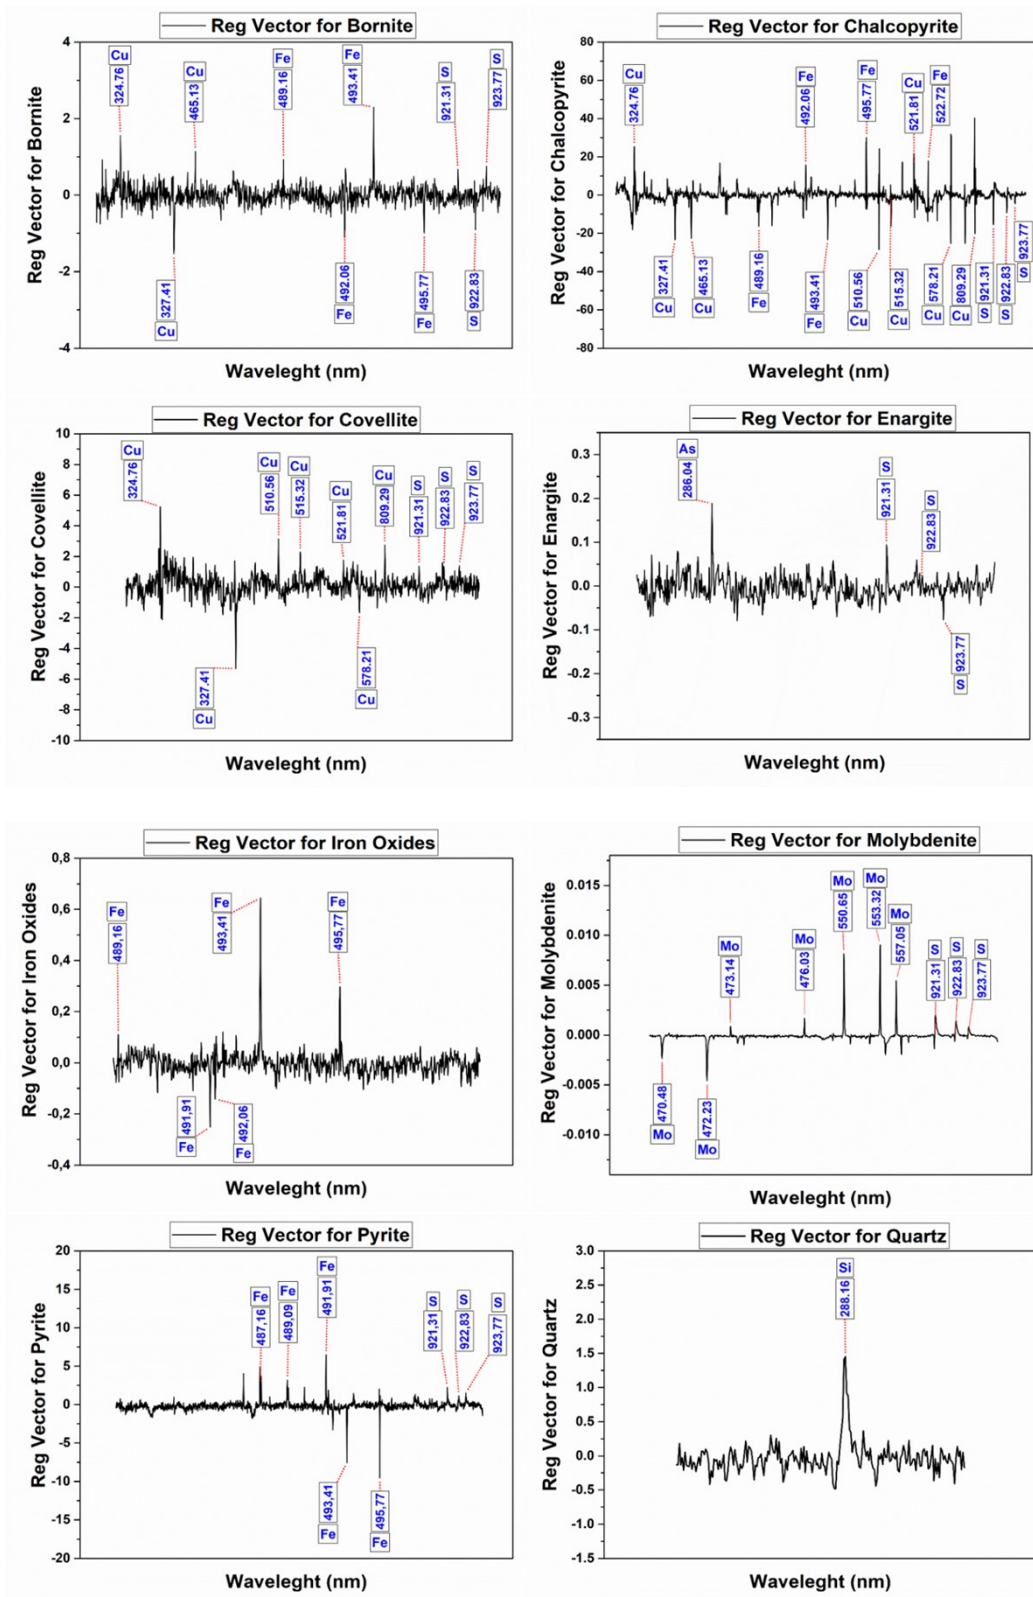

**Figure S3.** MCR component vs reference spectra (spectral profile) and total spectra reconstructed ( $CS^T$ ) by MCR-ALS with correlation constrains for the mineral species.

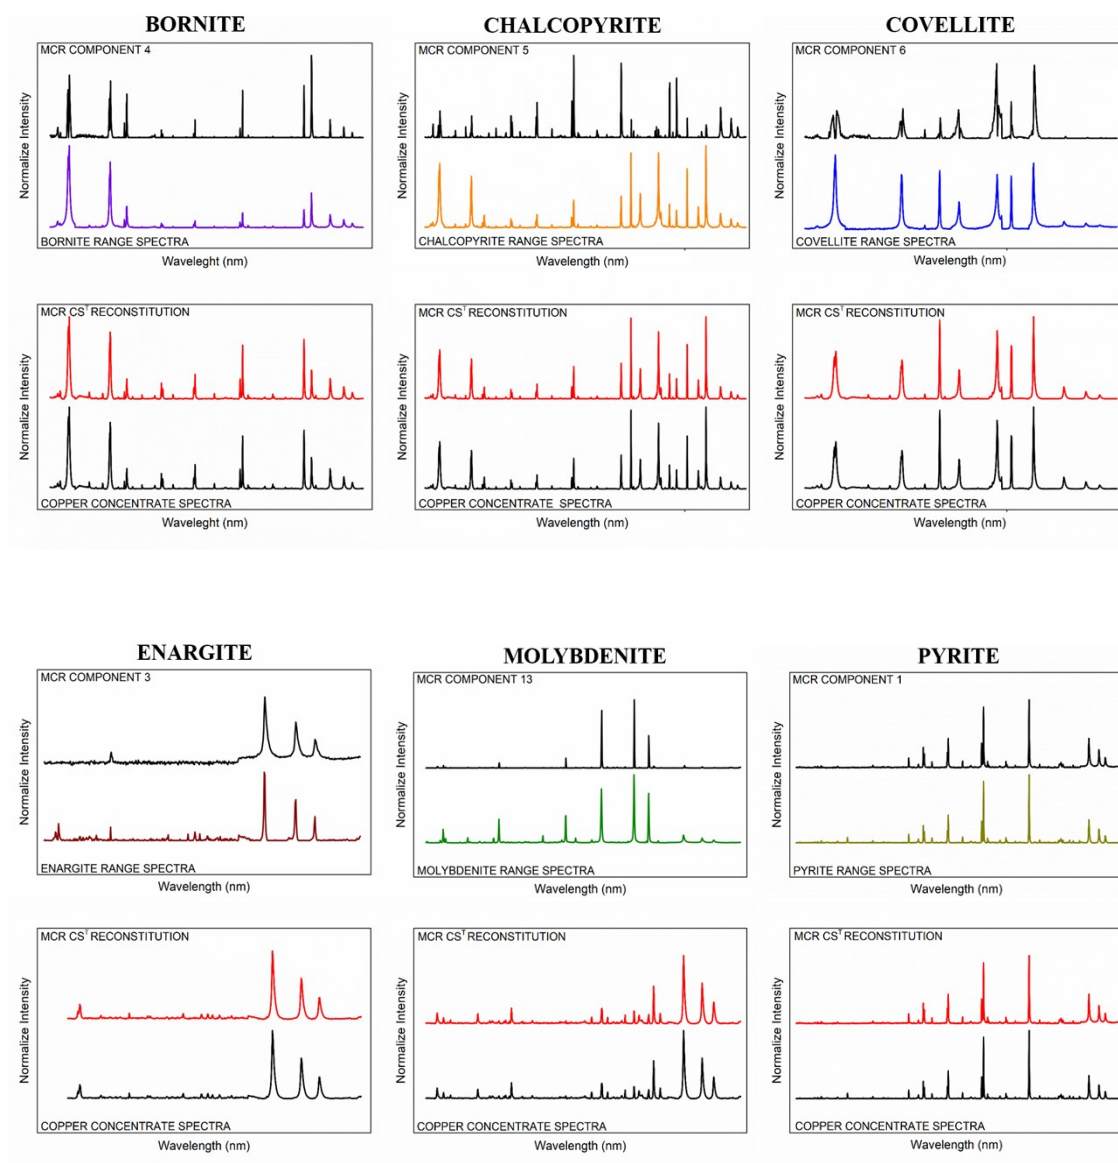

Supplement: d2ja00145d1.pdf [file d2ja00145d1.pdf]
